# Supplementary material for: Acquired Resistance to Immune Checkpoint Blockades: The Underlying Mechanisms and Potential Strategies
Source: Front Immunol. 2021 Jun 14;12:693609. doi: 10.3389/fimmu.2021.693609 (PMC8236848; doi:10.3389/fimmu.2021.693609)
Supplement: Supplementary file 1 [file Table_1.xlsx]

## Sheet: Sheet1
Supplementary Table 1. The duration of response for immunotherapy across multiple tumors.
Tumor Type	Study Name	Drug(s)	Line of Therapy	PD-L1 Level	Median Duration of Response (months)	PMID
Colorectal Cancer	IMblaze 370	atezolizumab	3+	any	4.8	31003911
MSI-H–dMMR Colorectal Cancer	Keynote 177	pembrolizumab	1	any	>32.4	33264544
Esophageal Cancer	Keynote 181	pembrolizumab	2	CPS>10%	9.3	33026938
Esophageal Squamous Cell Carcinoma	Attraction-3	nivolumab	2	any	6.9	31582355
Gastric Cancer	Keynote 061	pembrolizumab	2	CPS>1%	18.0	29880231
Gastric Cancer	keynote 062	pembrolizumab	1	any	13.7	32880601
				CPS>10%	19.3
Gastric or Esophagogastric Junction Cancer	Attraction-2	nivolumab	3+	any	9.53	28993052
Glioblastoma	CheckMate 143	nivolumab	2	any	11.1	32437507
Head and Neck Squamous Cell Carcinoma	Keynote 040	pembrolizumab	2+	any	18.4	30509740
Head and Neck Squamous Cell Carcinoma	Keynote 048	pembrolizumab	1	CPS>20%	22.6	31679945
				CPS>1%	23.4
				any	22.6
Hodgkin`s Lymphoma	Keynote 204	pembrolizumab	2+	any	20.7	33721562
Melanoma	Keynote 006	pembrolizumab	1+	any	53.5	31345627
		ipilimumab	1+	any	>57.7
Melanoma	CheckMate 067	nivolumab+ipilimumab	1	any	>54.6	31562797
		nivolumab			>36
		ipilimumab			14.4
Non–Small-Cell Lung Cancer	Keynote 010	pembrolizumab	2+	TPS>1%	>13.1	26712084
Non–Small-Cell Lung Cancer	Keynote 024	pembrolizumab	1	TPS>50%	>11.2	27718847
Non–Small-Cell Lung Cancer	Keynote 042	pembrolizumab	1	TPS>1%	20.2	30955977
Non–Small-Cell Lung Cancer	CheckMate 017/057	nivolumab	2	any	19.9	33449799
				TPS<1%	14.6
				TPS>1%	25.2
Non–Small-Cell Lung Cancer	CheckMate 227	nivolumab+ipilimumab	1	TPS>1%	23.2	31562796
		nivolumab	1	TPS>1%	15.5
		nivolumab+ipilimumab	1	TPS<1%	18.0
Non–Small-Cell Lung Cancer	IMpower 110	atezolizumab	1	TC>50% or IC>10%	>15.7	32997907
				TC>5% or IC>5%	>15.2
				TC>1% or IC>1%	>13.4
Non–Small-Cell Lung Cancer	OAK	atezolizumab	2+	any	16.3	27979383
				TC1/2/3 or IC1/2/3	16.0
Non–Small-Cell Lung Cancer	ARCTIC	durvalumab+tremelimumab	3+	TC<25%	12.2	32201234
		durvalumab		TC<25%	10.0
		tremelimumab		TC<25%	4.7
		durvalumab		TC>25%	9.5
Non–Small-Cell Lung Cancer	MYSTIC	durvalumab	1	TC>25%	>12.0	32271377
		durvalumab+tremelimumab	1	TC>25%	>12.0
Renal Cell Carcinoma	CheckMate 025	nivolumab	2+	any	12.0	26406148
Renal Cell Carcinoma	CheckMate 214	nivolumab+ipilimumab	1	any	>55	33246931
Small-Cell Lung Cancer	CheckMate 331	nivolumab	2	any	8.3	33539946
Triple-Negative Breast Cancer	Keynote 119	pembrolizumab	2+	any	12.2	33676601
Urothelial Cancer	Keynote 045	pembrolizumab	2	any	>27.7	31050707
Urothelial Cancer	IMvigor 211	atezolizumab	2+	IC2/3	15.9	29268948
				any	21.7
Notes:
Because the median duration of response was not available at the cut-off time in some studies, we listed them as ">median follow-up time".
CPS, combined positive score; TPS, tumor proportion score; TC , PD-L1 on tumour cells; IC, PD-L1 on tumour-infiltrating immune cells.
